# Supplementary material
Source: PubMed Central journal article supplement (PMC10020934)
Supplement: jamaoncol-e227975-s002.pdf [file jamaoncol-e227975-s002.pdf]

## Data Sharing Statement

Bryan. Pembrolizumab Added to Ifosfamide, Carboplatin, and Etoposide Chemotherapy for Relapsed or Refractory Classic Hodgkin Lymphoma. *JAMA Oncol.* Published March 16, 2023. doi:10.1001/jamaoncol.2022.7975

### Data

**Data available:** Yes

**Data types:** Deidentified participant data

**How to access data:** Original data may be obtained by e-mail request to the corresponding author Jane N. Winter (j-winter@northwestern.edu). Data on individual participants will not be shared.

**When available:** With publication

### Supporting Documents

**Document types:** None

### Additional Information

**Who can access the data:** Researchers whose proposed use of the data has been approved

**Types of analyses:** For any purpose

**Mechanisms of data availability:** After approval of a proposal and with a signed data use agreement
